David Voehringer, Tiffany A. Reese, Xiaozhu Huang, Kanade Shinkai, and Richard M. Locksley  
Vol. 203, No. 6, June 12, 2006. Pages 1435–1446.

Please note that an error appeared in the online early release version of this article. The final html, pdf, and print versions have been corrected. For reference, the correction appears below.

---

A portion of text from the third and fourth sentences under the subheading “Innate IL-4/IL-13 is required for Th2 cell accumulation in the lung” was erroneously deleted. The corrected sentences appear below.

However, accumulation of Th2 cells in the infected lung tissues was 10-fold reduced in the IL-4/IL-13/TCR- $\alpha$ -deficient recipient mice as compared with the TCR- $\alpha$ -deficient recipient mice. Because adoptive transfer of T cells into T cell-deficient mice can lead to homeostatic proliferation and differentiation of donor T cells, which might influence the outcome of the experiment, similar experiments were performed in nonlymphopenic mice after reconstitution with antigen-specific CD4 T cells.
